# Supplementary material for: An Algorithm Combining Patient Performance Status, Second Hit Analysis, PROVEAN and Dann Prediction Tools Could Foretell Sensitization to PARP Inhibitors in Digestive, Skin, Ovarian and Breast Cancers
Source: MDPI journal article supplement (doi:10.3390/cancers13133113), 2021-06-22
Supplement: s1 [file s1]

A

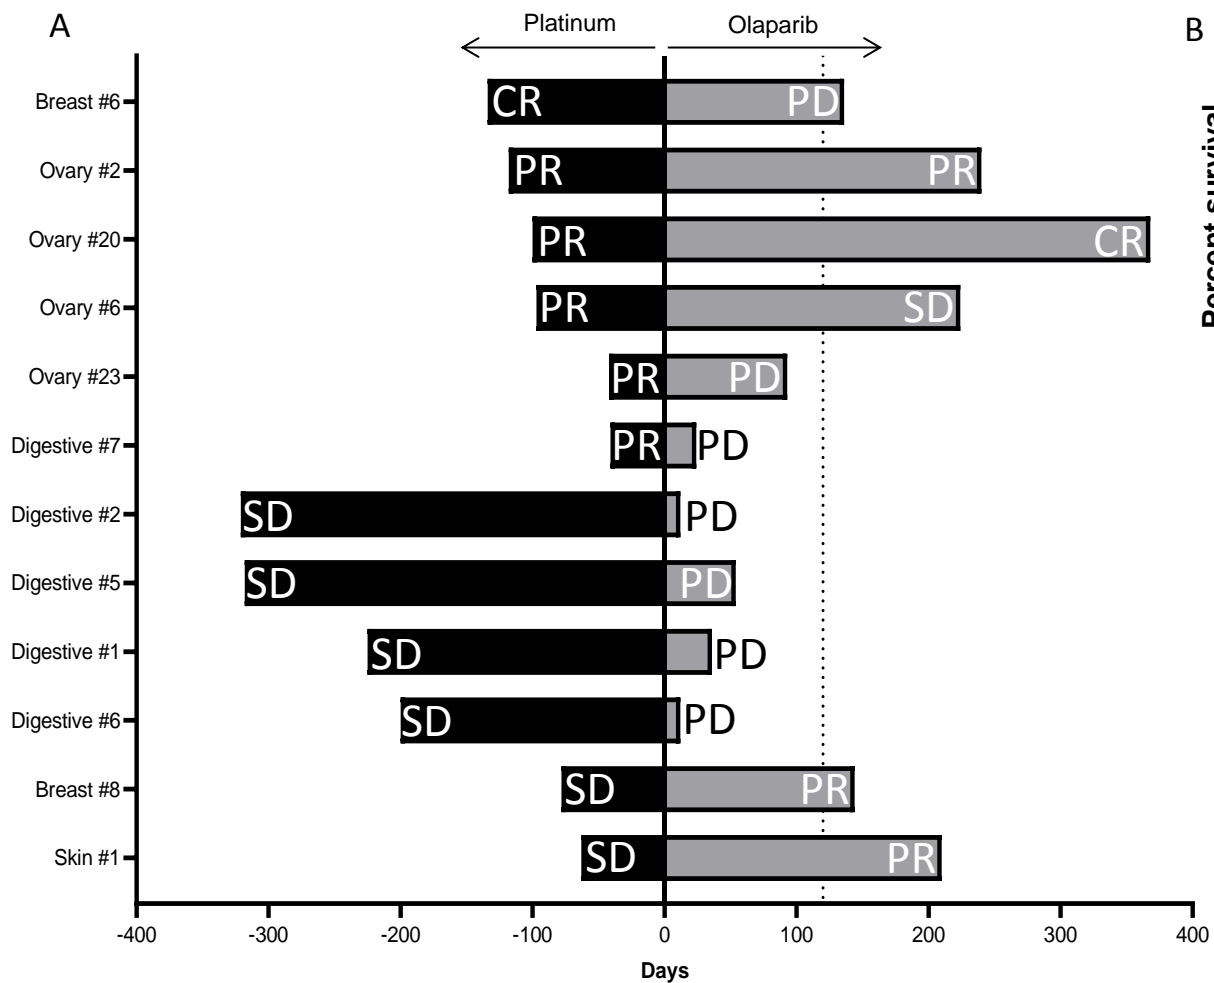

B

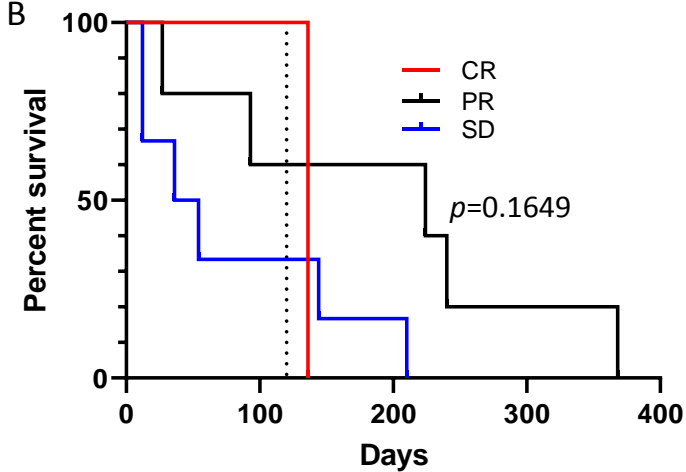

**Supplementary Figure S1: Response of VUS to platinum. A.** Duration and response (PD: Progressive Disease, SD: Stable Disease, PR: Partial Response, CR: Complete Response) to platinum treatment and subsequent olaparib treatment for VUS. The dashed line corresponds to 120 days. **B.** PFS curve of patients under olaparib treatment depending on their response to platinum based treatment.

Ovary #19

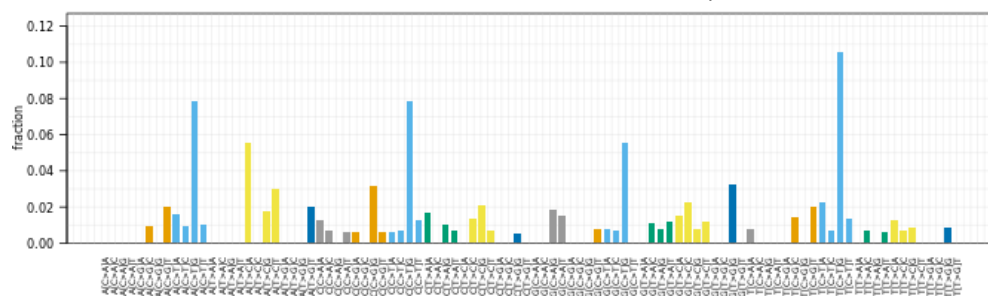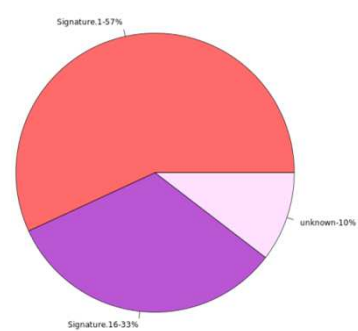

Ovary #21

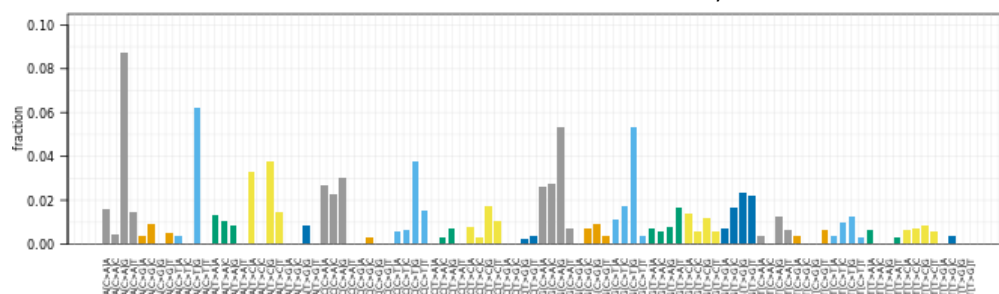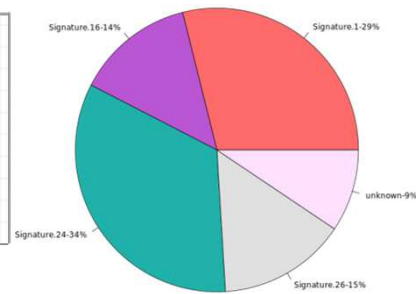

Breast #3

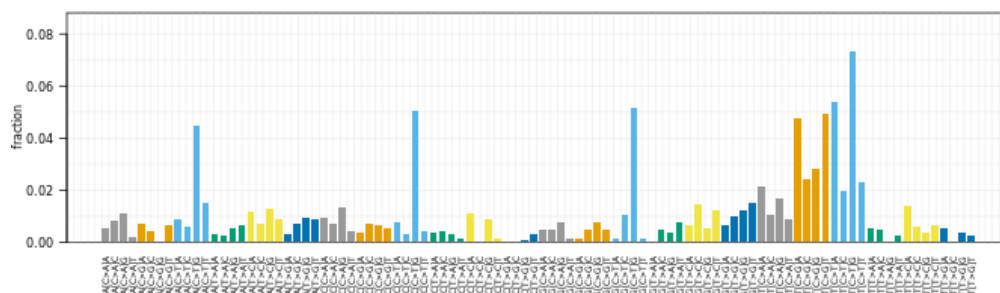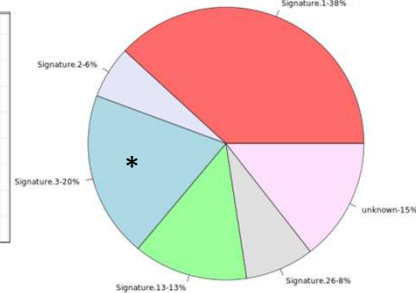

Breast #5

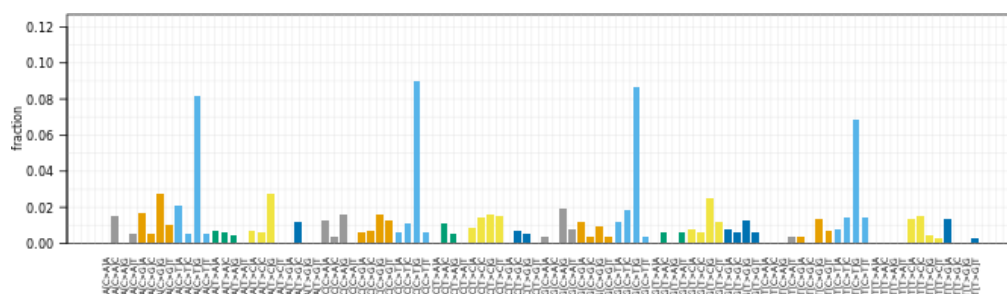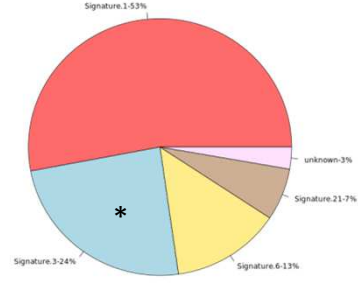

Breast #6

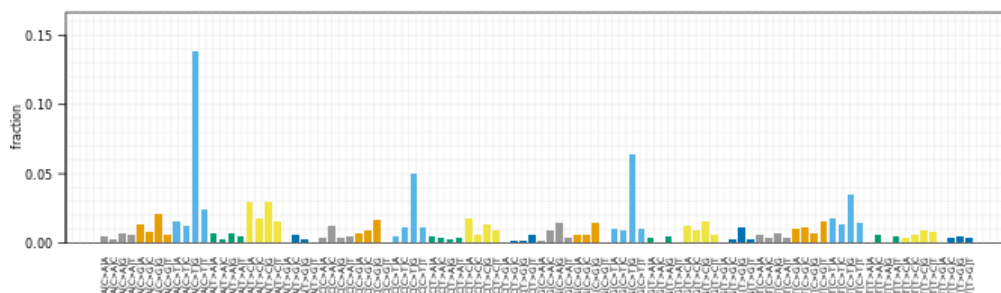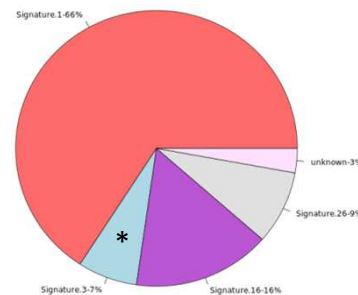

Breast #8

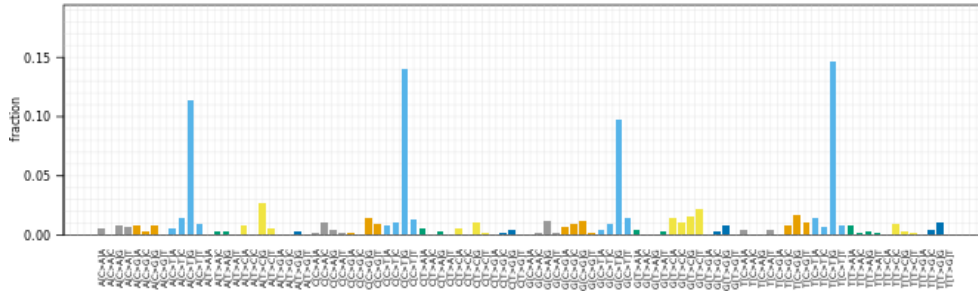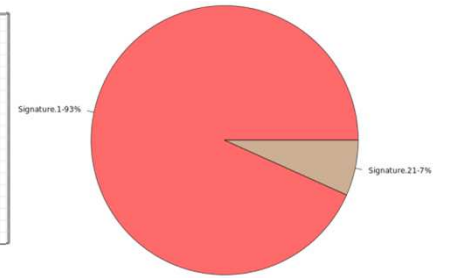

Digestive tract #1

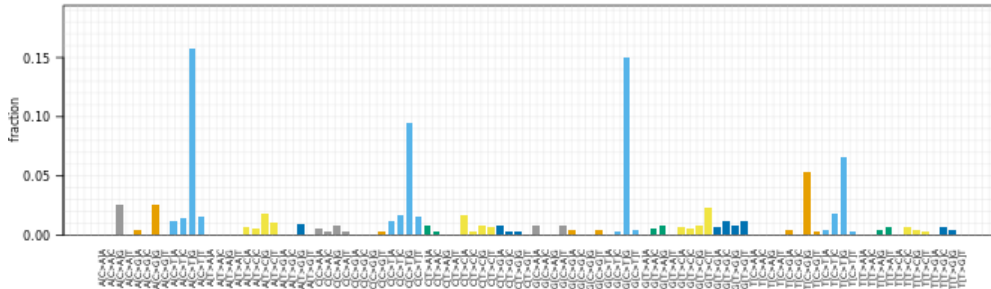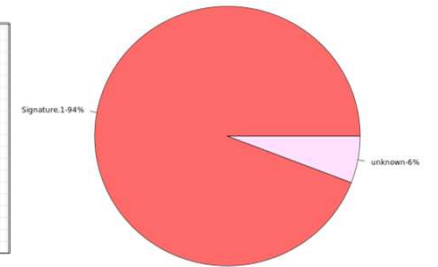

Digestive tract #3

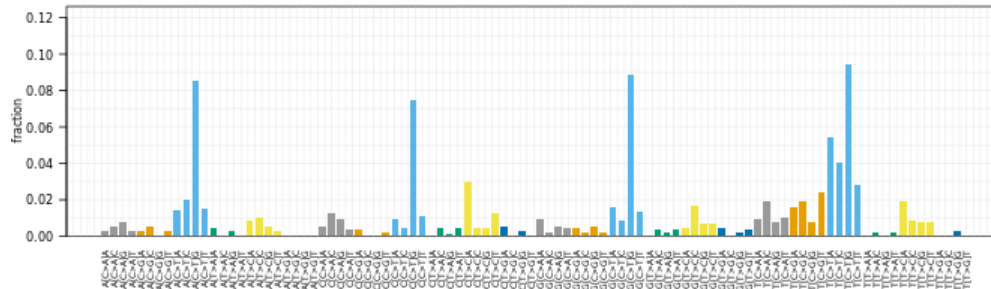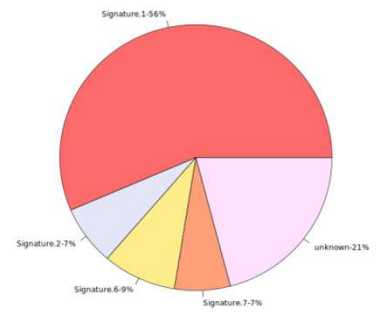

Digestive tract #4

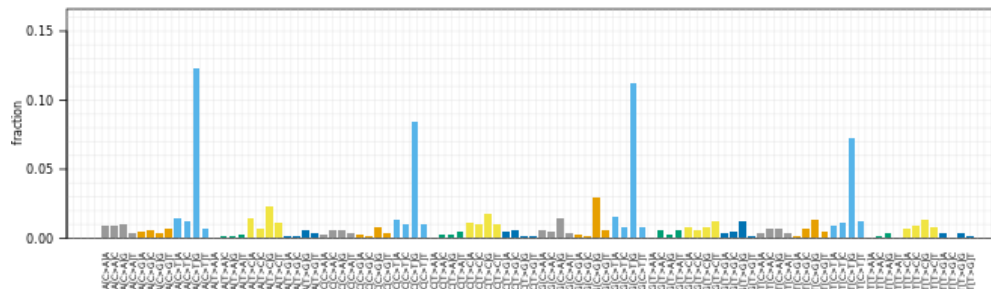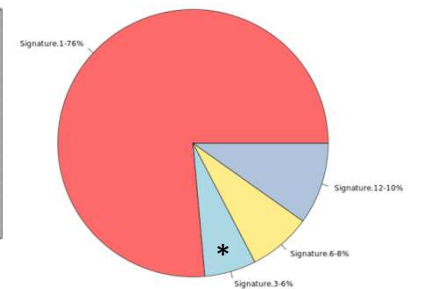

Digestive tract #5

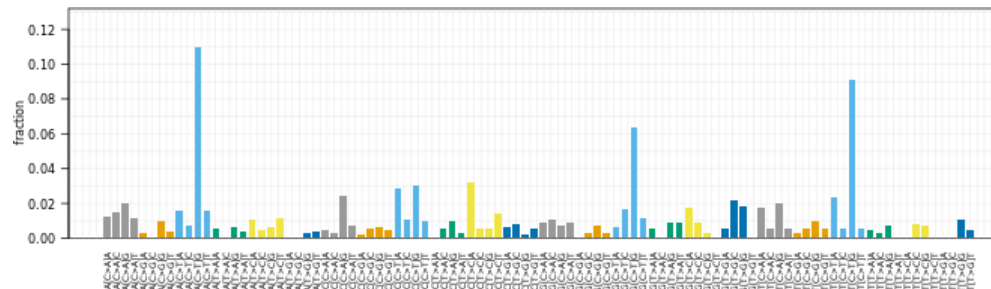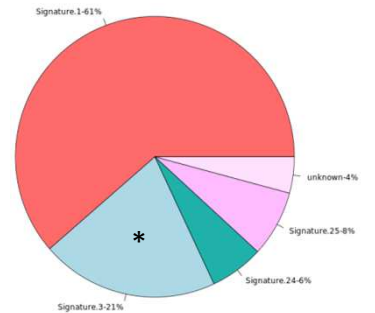

Digestive tract #6

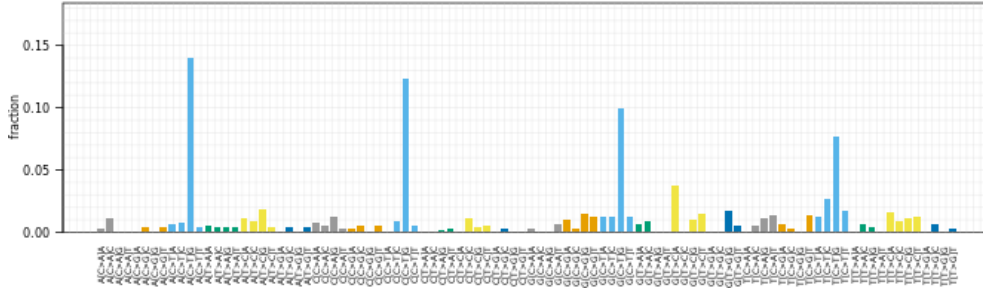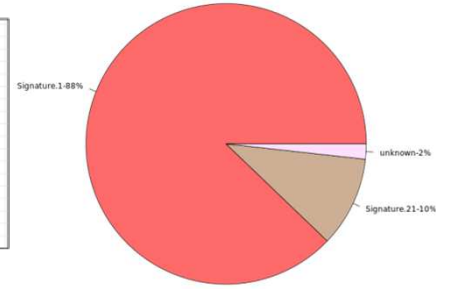

Digestive tract #7

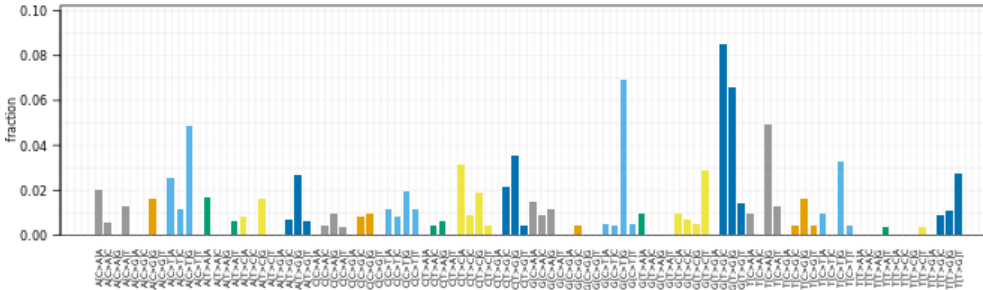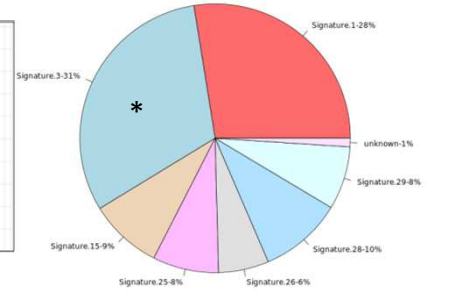

Digestive tract #8

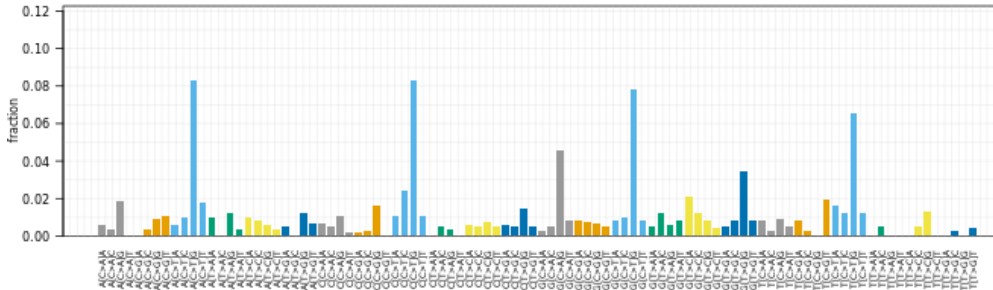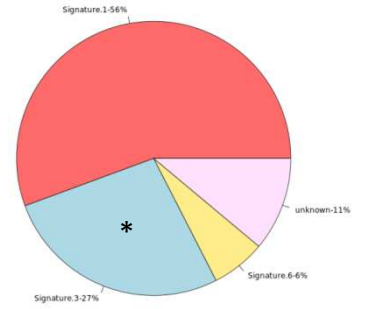

Skin #1

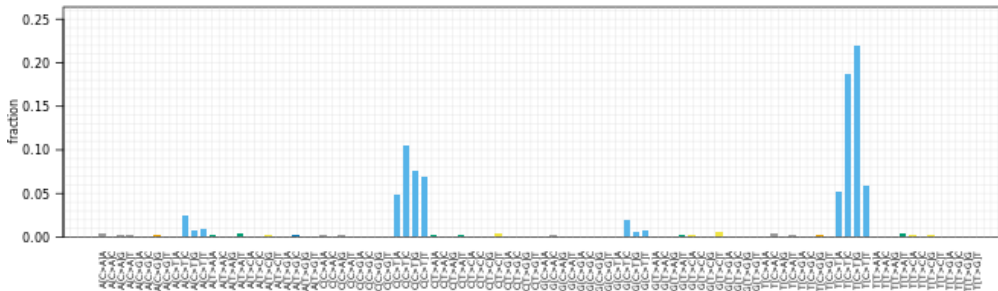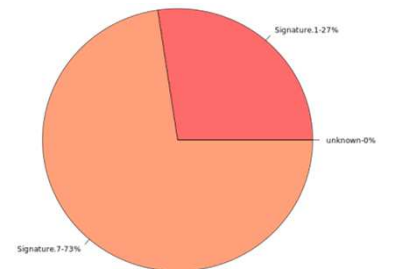

**Supplementary Figure S2: Genomic signature profile depending on Alexandrov's work obtained for the 14 patients with both somatic and germline exome analyses.** The pie charts indicate the distribution of different signatures bioinformatically detected. Signature 3 is presented in blue and marked with an asterisk.

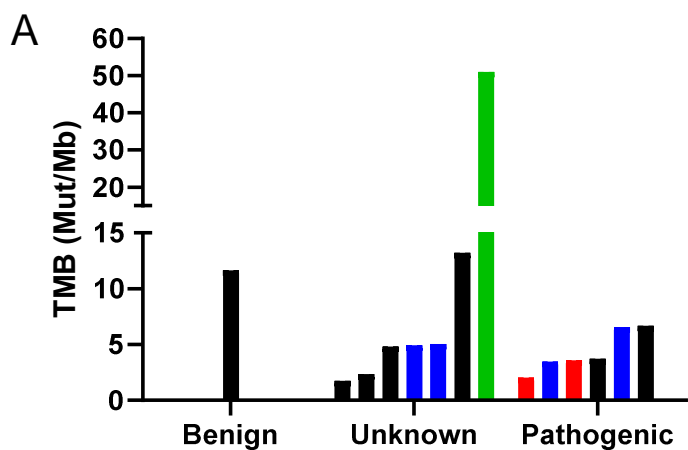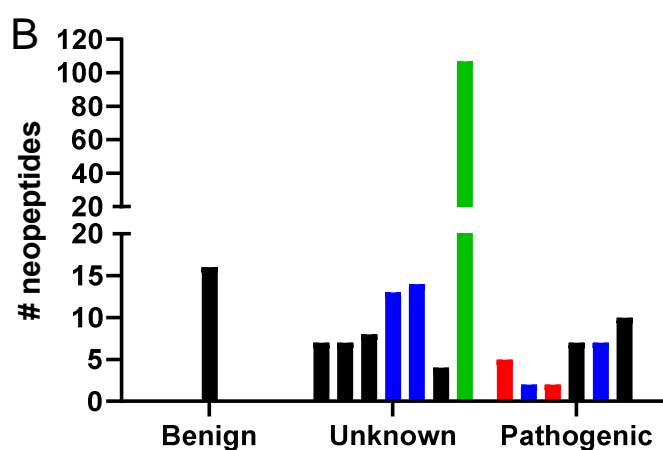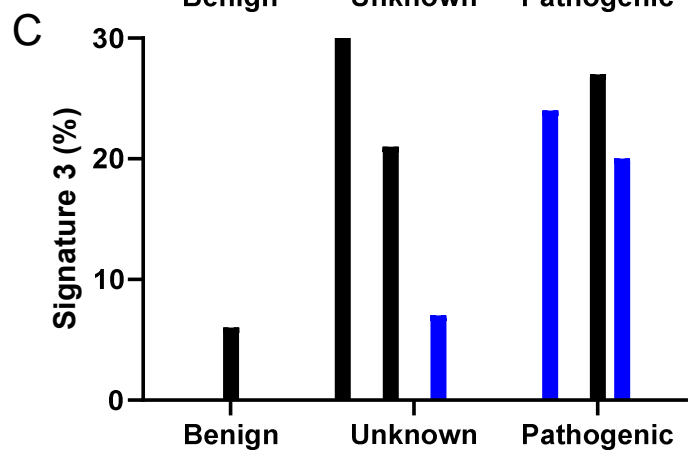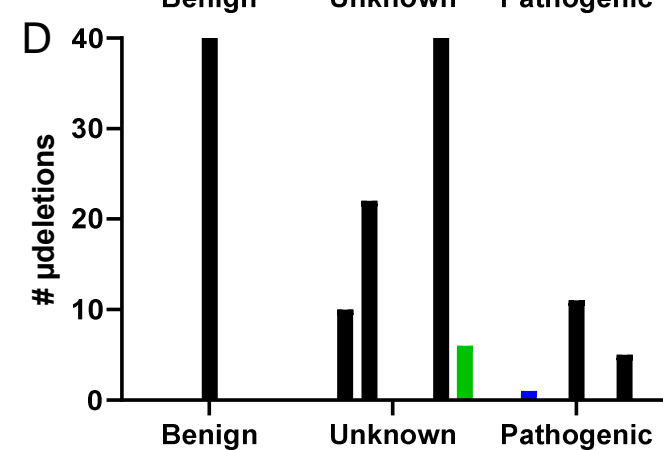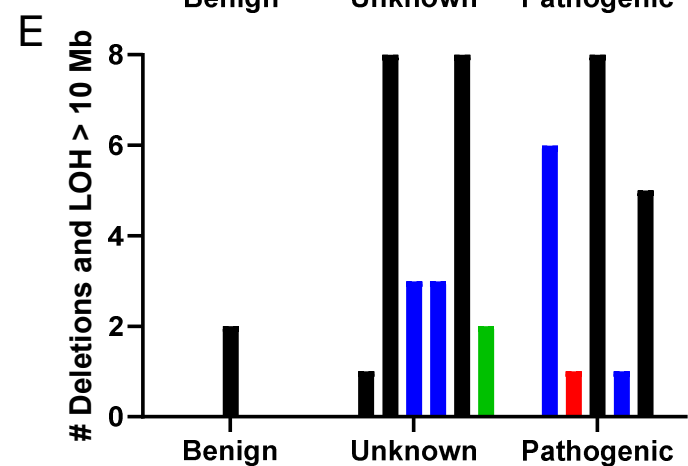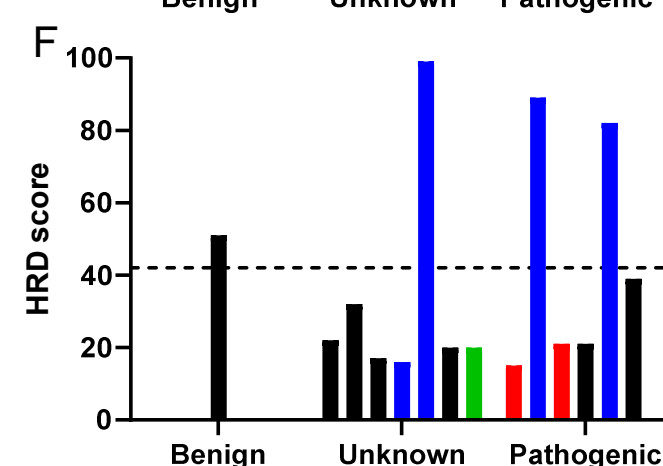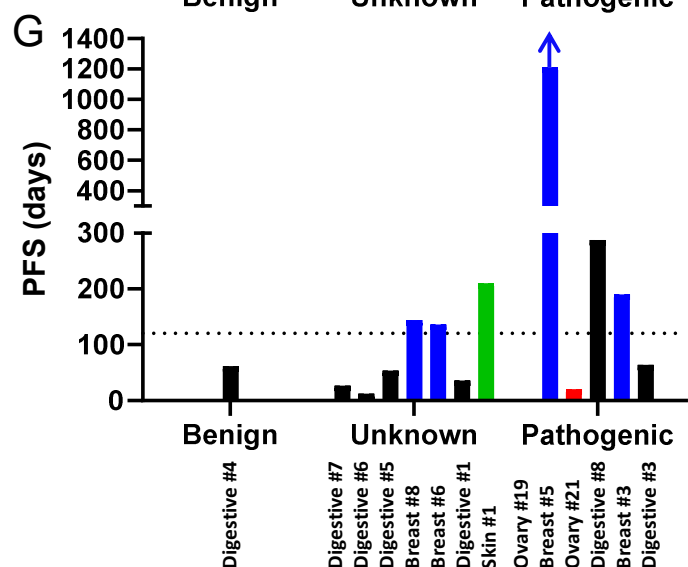

Digestive #4  
Digestive #7  
Digestive #6  
Digestive #5  
Digestive #8  
Breast #6  
Breast #1  
Skin #1  
Ovary #19  
Breast #5  
Ovary #21  
Ovary #8  
Digestive #3  
Breast #3  
Digestive #3

**Supplementary Figure S3: Graphical presentation of complex analyses obtained from somatic and germline exomes.** **A.** Tumor Mutation Burden, **B.** number of neoepitopes, **C.** Alexandrov's signature 3, **D.** number of small deletions, **E.** number of deletions and loss of heterozygosity (LOH) >10 Mb, **F.** HRD score (dashed line corresponds to the official threshold of 42), and **G.** PFS (dashed line corresponds to 120 days, the arrow indicates that olaparib treatment is still ongoing). Patients are classified depending on the official classification of their variants, and in a group from lower to higher TMB. Patients with a digestive tract cancer are in black, patients with a breast cancer are in blue, patients with an ovary cancer are in red and a patient with a skin cancer is in green.



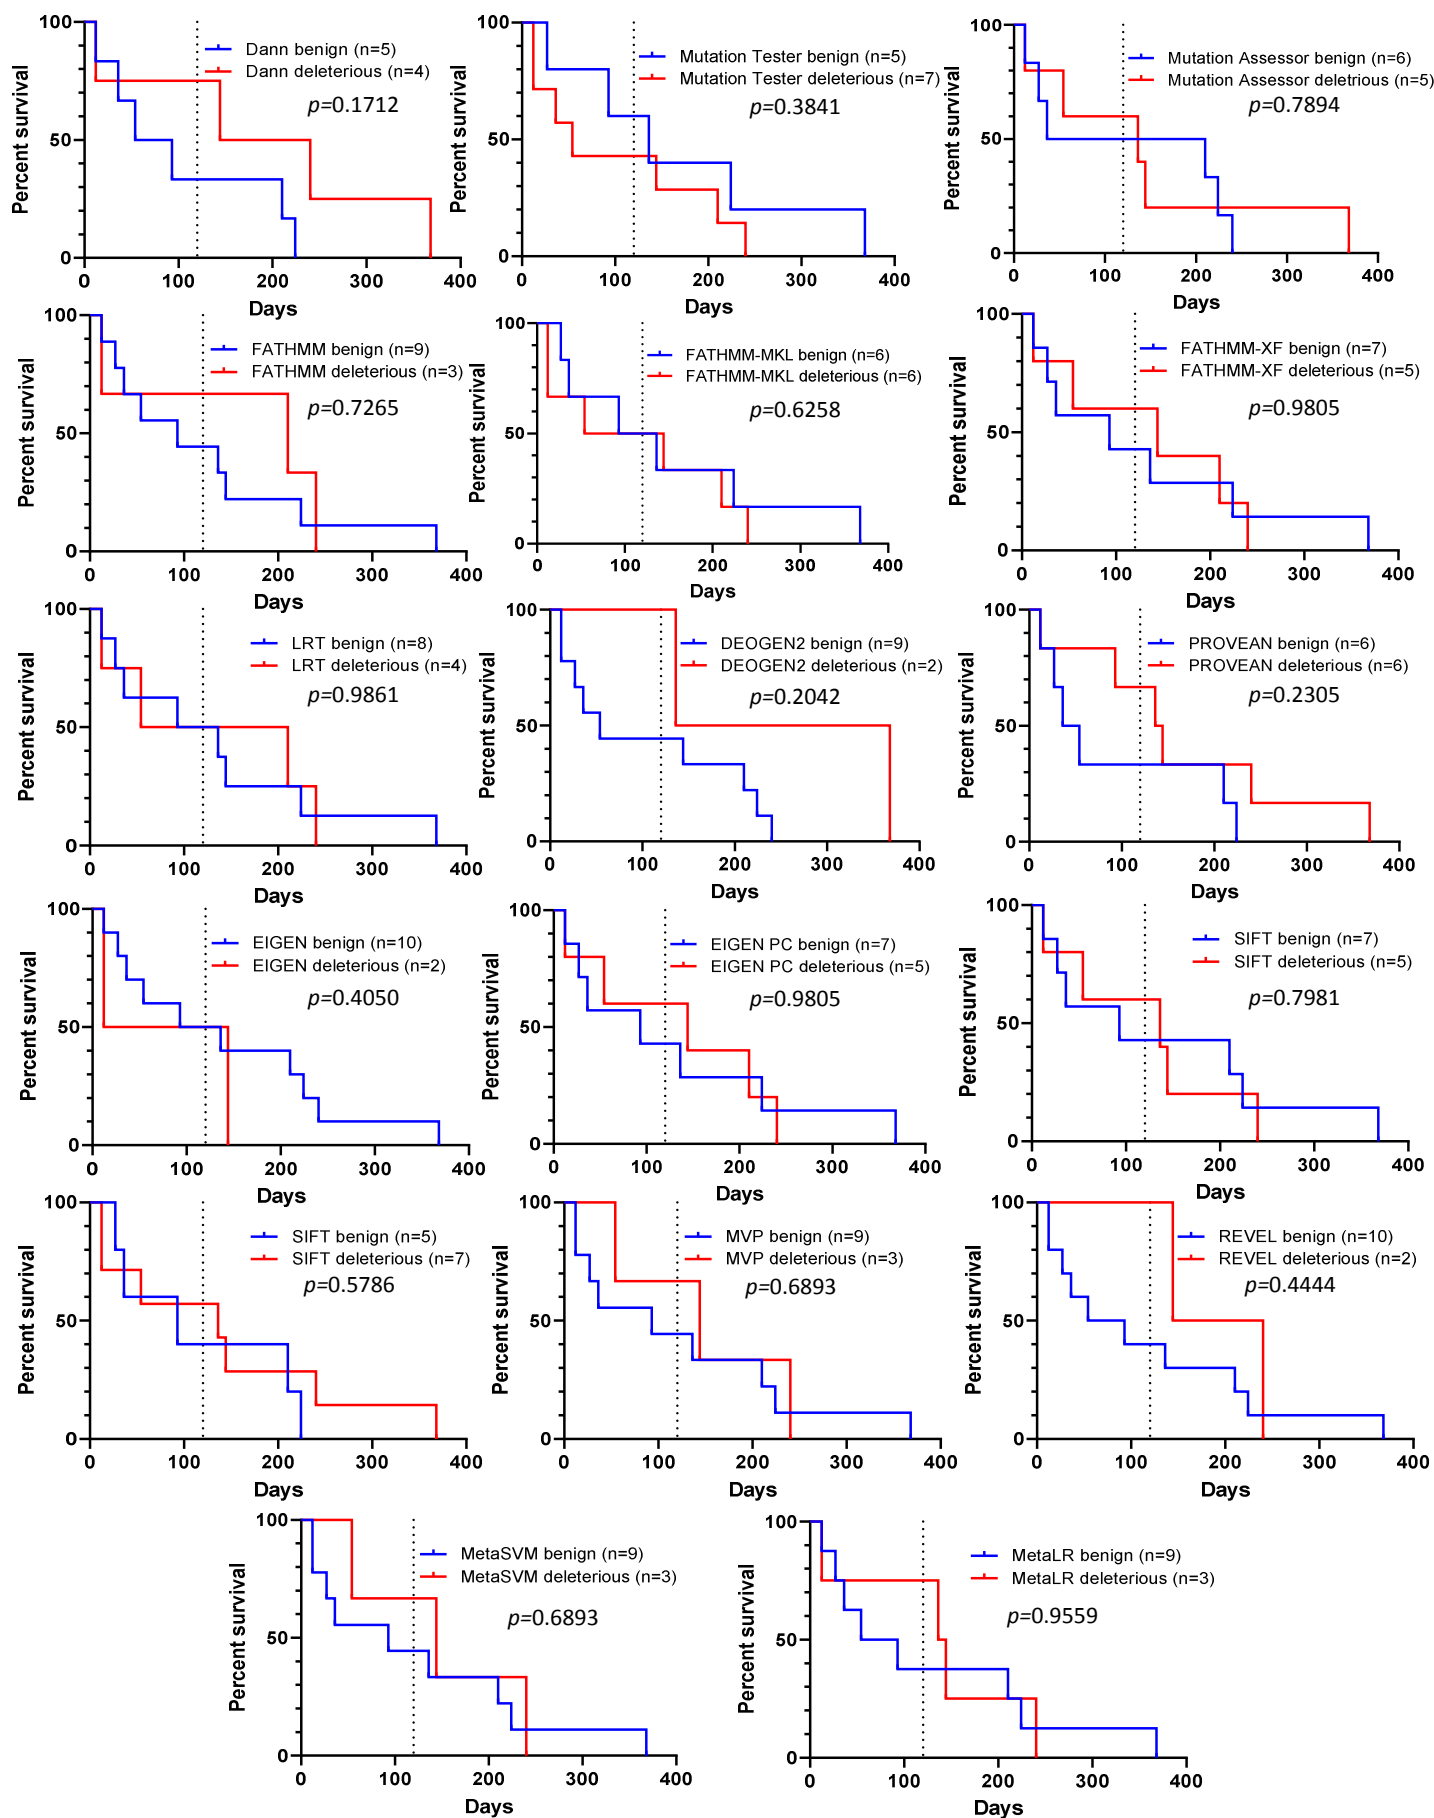

**Supplementary Figure S4: PFS under olaparib treatment according to pathogenicity prediction of VUS by 17 *in silico* prediction tools.** *In silico* prediction tools are indicated in the legend of each graph. The dashed line corresponds to 120 days.

Supplementary Table S1: Detail of data obtained with the 6 complex analyses from tumor and germline exome sequencing

| Cancer type,<br>Patient No. | Gene(s)                     | Impact          | TMB<br>(Mut/Mb) | #<br>Neopeptides | Signature<br>3 (%) | #<br>μdeletions | # Deletions and<br>LOH > 10 Mb | HRD score | PFS (days)                  |
|-----------------------------|-----------------------------|-----------------|-----------------|------------------|--------------------|-----------------|--------------------------------|-----------|-----------------------------|
| Ovarian #19                 | <i>BRCA2</i>                | Pathogenic      | 2.03            | 5                | 0                  | 0               | 0                              | 15        | 1 (allergic reaction)       |
| Ovarian #21                 | <i>BRCA2</i>                | Pathogenic      | 3.58            | 2                | 0                  | 0               | 1                              | 21        | 288                         |
| Breast #3                   | <i>BRCA1</i>                | Pathogenic      | 6.59            | 7                | 20                 | 0               | 1                              | 82        | 190                         |
| Breast #5                   | <i>BRCA1</i>                | Pathogenic      | 3.48            | 2                | 24                 | 1               | 6                              | 89        | 1212 (still under olaparib) |
| Breast #6                   | <i>BRCA1</i>                | Unknown         | 5.04            | 14               | 7                  | 0               | 3                              | 99        | 136                         |
| Breast #8                   | <i>BRCA2, RAD51D</i>        | Unknown         | 4.92            | 13               | 0                  | 0               | 3                              | 16        | 144                         |
| Digestive tract #1          | <i>PALB2</i>                | Unknown         | 13.23           | 4                | 0                  | 41              | 8                              | 20        | 36                          |
| Digestive tract #3          | <i>CHEK2</i>                | Pathogenic      | 6.7             | 10               | 0                  | 5               | 5                              | 39        | 64                          |
| Digestive tract #4          | <i>BRCA1</i>                | Probably Benign | 11.64           | 16               | 6                  | 41              | 2                              | 51        | 62                          |
| Digestive tract #5          | <i>BRCA1</i>                | Unknown         | 4.82            | 8                | 21                 | 22              | 8                              | 17        | 54                          |
| Digestive tract #6          | <i>BRCA1</i>                | Unknown         | 2.36            | 7                | 0                  | 10              | 1                              | 32        | 12                          |
| Digestive tract #7          | <i>BRIP1</i>                | Unknown         | 1.73            | 7                | 31                 | 0               | 0                              | 22        | 27                          |
| Digestive tract #8          | <i>ATM</i>                  | Pathogenic      | 3.75            | 7                | 27                 | 11              | 8                              | 21        | 20                          |
| Skin #1                     | <i>PALB2, RAD50, RAD51C</i> | Unknown         | 51.04           | 107              | 0                  | 6               | 2                              | 20        | 210                         |

Supplementary Table S2: Prediction of pathogenicity of VUS using different *in silico* tools

| Genes         | Nucleotide variation | Protein variation | Dann       | Mutation Tester | Mutation Assessor | FATHMM    | FATHMM MKL | FATHMM XF | LRT         | DEOGEN2   | PROVEAN prediction |
|---------------|----------------------|-------------------|------------|-----------------|-------------------|-----------|------------|-----------|-------------|-----------|--------------------|
| <i>BRCA1</i>  | c.53T>C              | p.Met18Thr        | Pathogenic | Disease causing | Neutral           | Damaging  | Damaging   | Damaging  | Deleterious | Tolerated | Damaging           |
| <i>PALB2</i>  | c.656A>G             | p.Asp219Gly       | Neutral    | Polymorphism    | Neutral           | Tolerated | Neutral    | Neutral   | Neutral     | Tolerated | Neutral            |
| <i>BRCA1</i>  | c.2744C>T            | p.Ser915Phe       | Pathogenic | Polymorphism    | Medium            | Tolerated | Neutral    | Neutral   | Neutral     | Damaging  | Damaging           |
| <i>BRCA2</i>  | c.1690T>C            | p.Met990Lys       | Neutral    | Polymorphism    | Unknown           | Tolerated | Neutral    | Neutral   | Neutral     | Unknown   | Damaging           |
| <i>BRCA1</i>  | c.2783G>T            | p.Gly928Val       | Unknown    | Polymorphism    | Medium            | Tolerated | Neutral    | Neutral   | Neutral     | Damaging  | Damaging           |
| <i>BRCA2</i>  | c.4860A>T            | p.Leu1620Phe      | Neutral    | Polymorphism    | Unknown           | Tolerated | Neutral    | Neutral   | Neutral     | Unknown   | Damaging           |
| <i>RAD51D</i> | c.328G>A             | p.Asp110Asn       | Pathogenic | Disease causing | Medium            | Tolerated | Damaging   | Damaging  | Neutral     | Tolerated | Damaging           |
| <i>PALB2</i>  | c.2719G>A            | p.Glu907Lys       | Neutral    | Disease causing | Low               | Tolerated | Neutral    | Neutral   | Neutral     | Tolerated | Neutral            |
| <i>BRCA1</i>  | c.2521C>T            | p.Arg841Trp       | Neutral    | Polymorphism    | Low               | Tolerated | Neutral    | Neutral   | Neutral     | Tolerated | Damaging           |
| <i>UIMC1</i>  | c.1690T>C            | p.Tyr564His       | Pathogenic | Disease causing | Medium            | Tolerated | Damaging   | Damaging  | Deleterious | Tolerated | Damaging           |
| <i>BRCA1</i>  | c.5128A>C            | p.Met1710Leu      | Neutral    | Disease causing | Medium            | Tolerated | Damaging   | Damaging  | Deleterious | Tolerated | Neutral            |
| <i>BRCA1</i>  | c.5295A>C            | p.Glu1786Asp      | Unknown    | Disease causing | Low               | Damaging  | Damaging   | Neutral   | Neutral     | Tolerated | Neutral            |
| <i>BRIP1</i>  | c.3G>A               | p.Met1?           | Neutral*   | Neutral*        | Neutral*          | Neutral*  | Neutral*   | Neutral*  | Neutral*    | Neutral*  | Neutral*           |
| <i>PALB2</i>  | c.2431C>T            | p.Pro811Ser       | Neutral    | Polymorphism    | Low               | Tolerated | Damaging   | Neutral   | Neutral     | Tolerated | Neutral            |
| <i>RAD50</i>  | c.3041A>G            | p.Gln1014Arg      | Neutral    | Disease causing | Low               | Damaging  | Damaging   | Damaging  | Deleterious | Tolerated | Neutral            |
| <i>RAD51C</i> | c.584C>T             | p.Ala195Val       | Neutral    | Disease causing | Low               | Tolerated | Damaging   | Neutral   | Deleterious | Tolerated | Neutral            |

\*New in frame initiation codon, 3 codons later.

| Genes         | Nucleotide variation | Protein variation | EIGEN      | EIGEN PC   | SIFT      | SIFT4G    | MVP        | REVEL      | Primate AI | MetaSVM   | MetaLR    |
|---------------|----------------------|-------------------|------------|------------|-----------|-----------|------------|------------|------------|-----------|-----------|
| <i>BRCA1</i>  | c.53T>C              | p.Met18Thr        | Benign     | Pathogenic | Damaging  | Damaging  | Pathogenic | Pathogenic | Tolerated  | Damaging  | Damaging  |
| <i>PALB2</i>  | c.656A>G             | p.Asp219Gly       | Benign     | Benign     | Tolerated | Tolerated | Benign     | Benign     | Tolerated  | Tolerated | Tolerated |
| <i>BRCA1</i>  | c.2744C>T            | p.Ser915Phe       | Benign     | Benign     | Tolerated | Damaging  | Benign     | Benign     | Tolerated  | Tolerated | Tolerated |
| <i>BRCA2</i>  | c.1690T>C            | p.Met990Lys       | Benign     | Benign     | Tolerated | Tolerated | Benign     | Benign     | Tolerated  | Tolerated | Tolerated |
| <i>BRCA1</i>  | c.2783G>T            | p.Gly928Val       | Benign     | Benign     | Damaging  | Damaging  | Benign     | Benign     | Tolerated  | Tolerated | Damaging  |
| <i>BRCA2</i>  | c.4860A>T            | p.Leu1620Phe      | Benign     | Benign     | Damaging  | Tolerated | Benign     | Benign     | Tolerated  | Tolerated | Tolerated |
| <i>RAD51D</i> | c.328G>A             | p.Asp110Asn       | Pathogenic | Pathogenic | Damaging  | Damaging  | Pathogenic | Pathogenic | Tolerated  | Damaging  | Damaging  |
| <i>PALB2</i>  | c.2719G>A            | p.Glu907Lys       | Benign     | Benign     | Tolerated | Tolerated | Benign     | Benign     | Tolerated  | Tolerated | Tolerated |
| <i>BRCA1</i>  | c.2521C>T            | p.Arg841Trp       | Benign     | Benign     | Damaging  | Damaging  | Benign     | Benign     | Tolerated  | Tolerated | Tolerated |
| <i>UIMC1</i>  | c.1690T>C            | p.Tyr564His       | Pathogenic | Pathogenic | Damaging  | Damaging  | Benign     | Benign     | Tolerated  | Tolerated | Tolerated |
| <i>BRCA1</i>  | c.5128A>C            | p.Met1710Leu      | Benign     | Pathogenic | Damaging  | Damaging  | Pathogenic | Benign     | Tolerated  | Damaging  | Tolerated |
| <i>BRCA1</i>  | c.5295A>C            | p.Glu1786Asp      | Benign     | Benign     | Tolerated | Damaging  | Benign     | Benign     | Tolerated  | Tolerated | Damaging  |
| <i>BRIP1</i>  | c.3G>A               | p.Met1?           | Neutral*   | Neutral*   | Neutral*  | Neutral*  | Neutral*   | Neutral*   | Neutral*   | Neutral*  | Neutral*  |
| <i>PALB2</i>  | c.2431C>T            | p.Pro811Ser       | Benign     | Benign     | Tolerated | Tolerated | Benign     | Benign     | Tolerated  | Tolerated | Tolerated |
| <i>RAD50</i>  | c.3041A>G            | p.Gln1014Arg      | Benign     | Benign     | Unknown   | Tolerated | Benign     | Benign     | Tolerated  | Tolerated | Tolerated |
| <i>RAD51C</i> | c.584C>T             | p.Ala195Val       | Benign     | Pathogenic | Tolerated | Tolerated | Benign     | Benign     | Tolerated  | Tolerated | Tolerated |

\*New in frame initiation codon, 3 codons later.
